# Supplementary material for: RelB-activated GPX4 inhibits ferroptosis and confers tamoxifen resistance in breast cancer
Source: PubMed Central journal article supplement — Redox Biol. 2023 Nov 4;68:102952. doi: 10.1016/j.redox.2023.102952 (PMC10641764; doi:10.1016/j.redox.2023.102952), 2023-11-04

Figure 3C

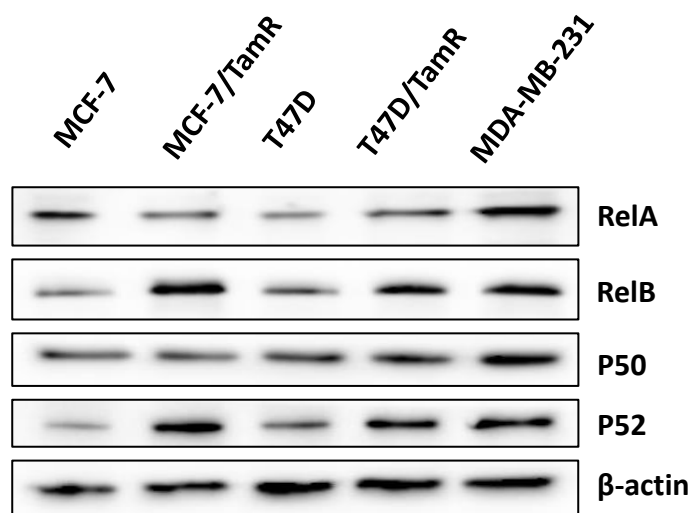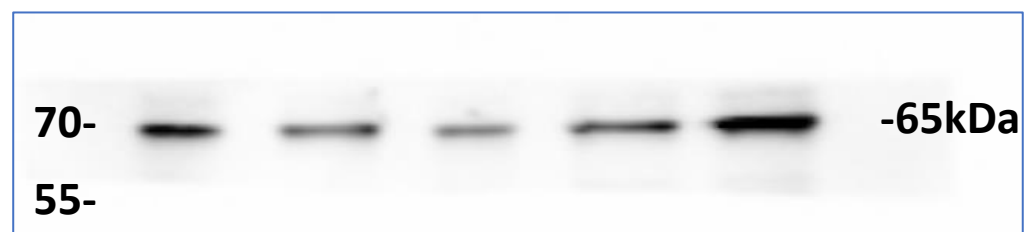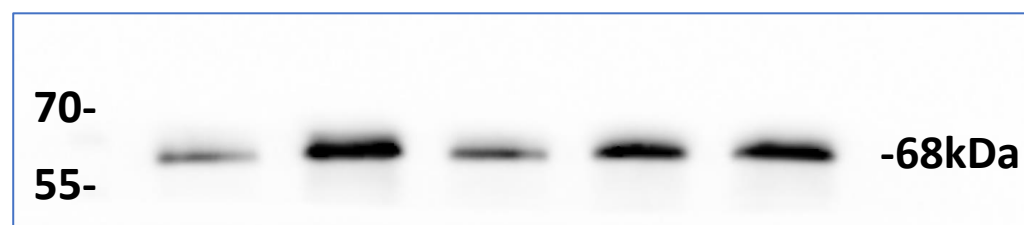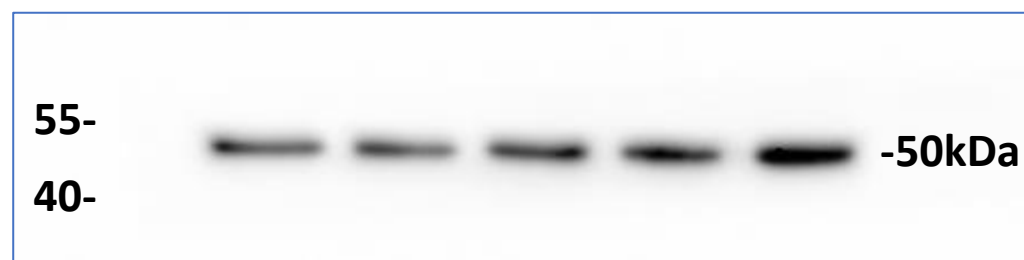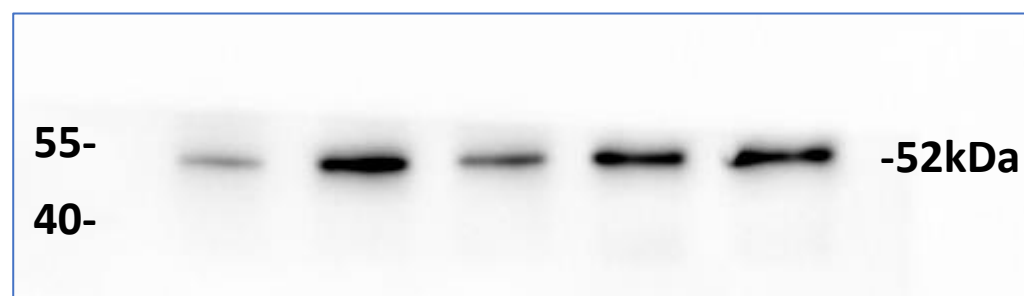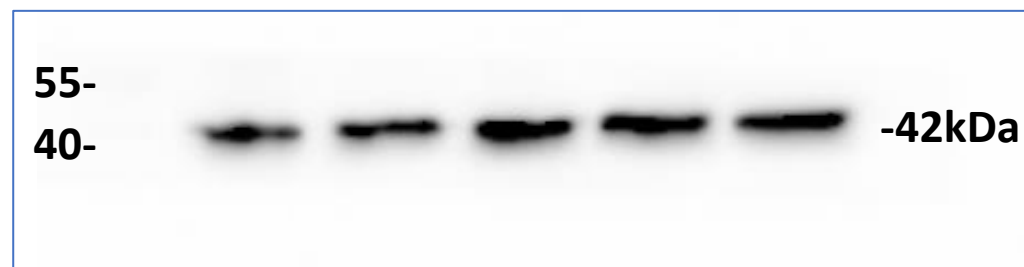

Figure 5C - MCF7

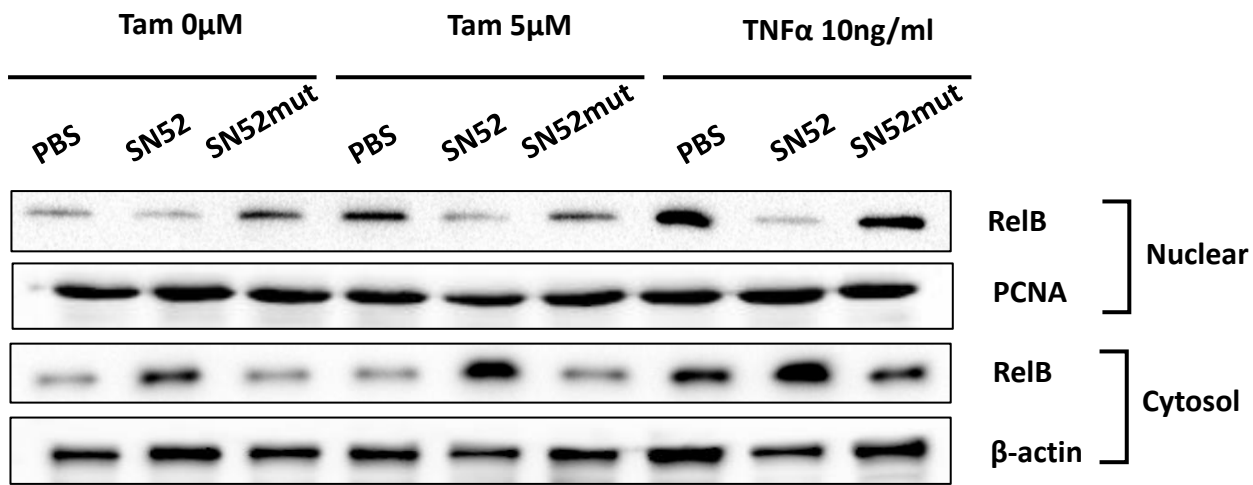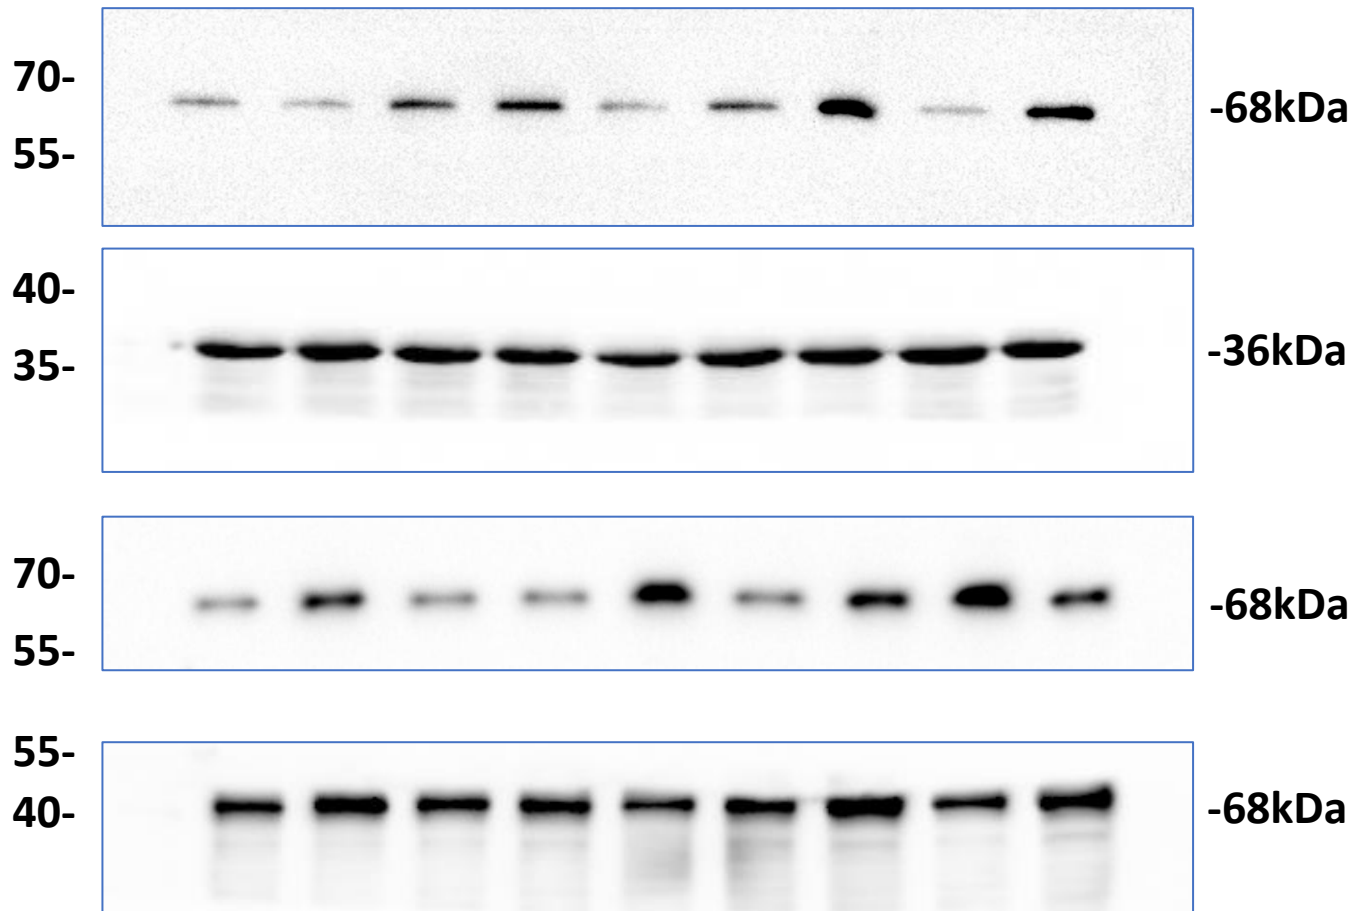

Figure 5C - MCF7/TAMR

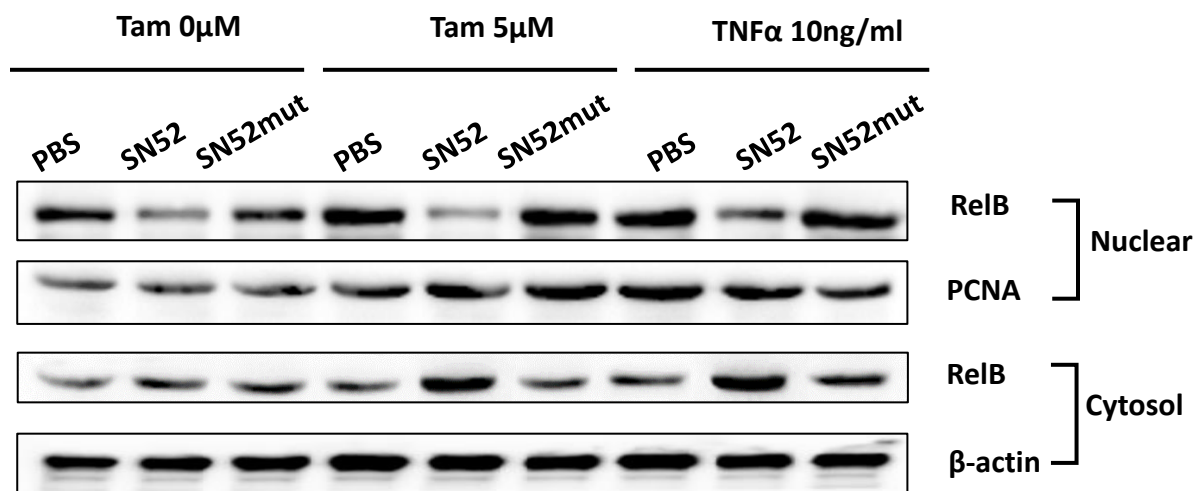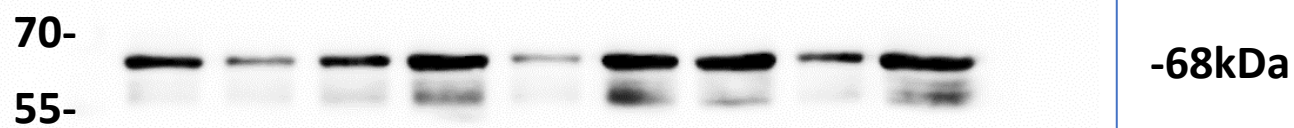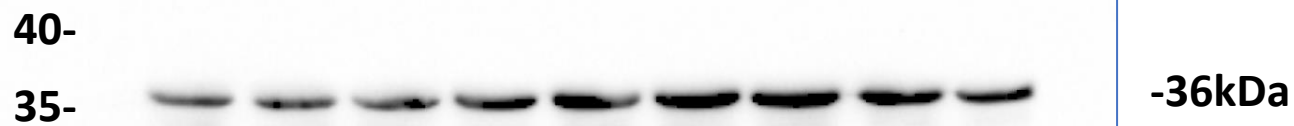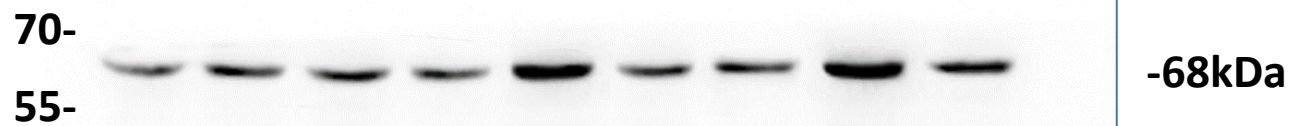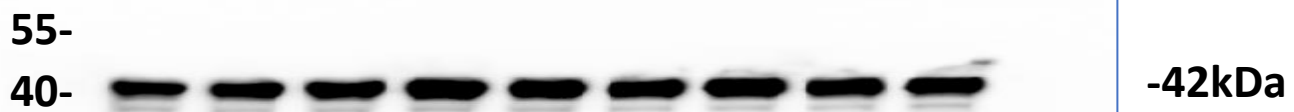

Figure 7B - MCF7

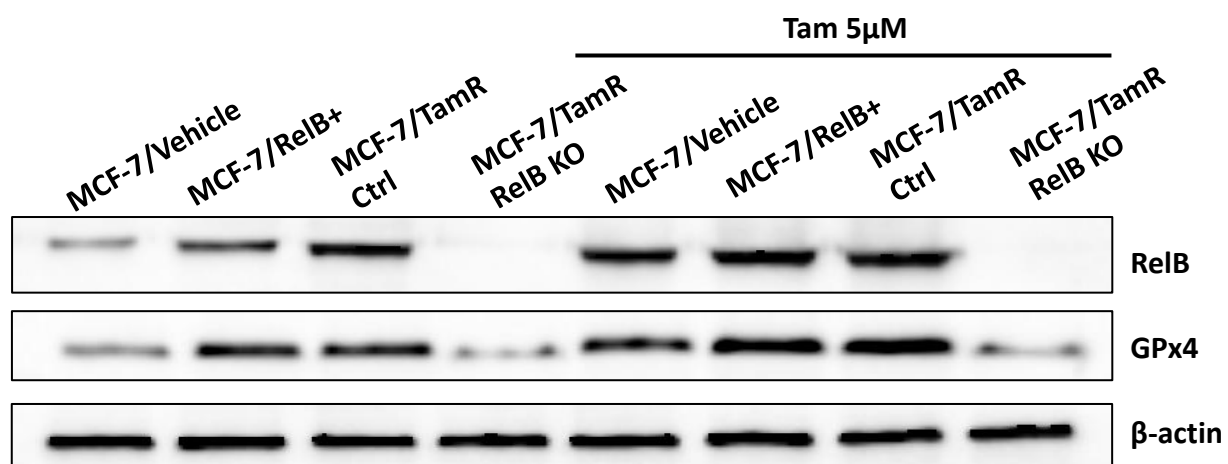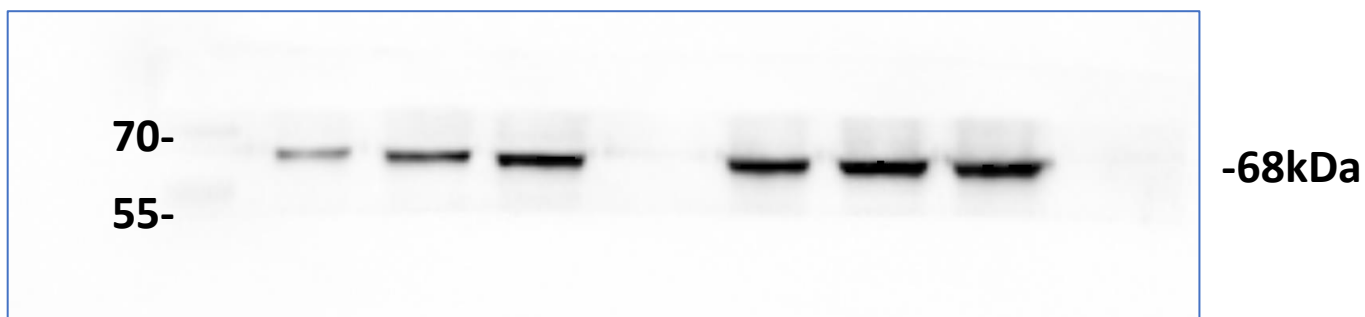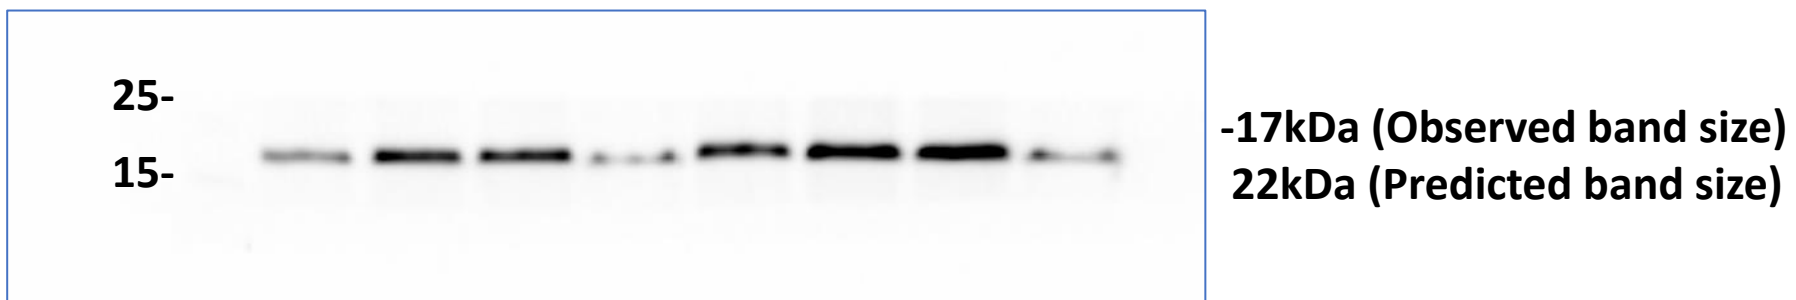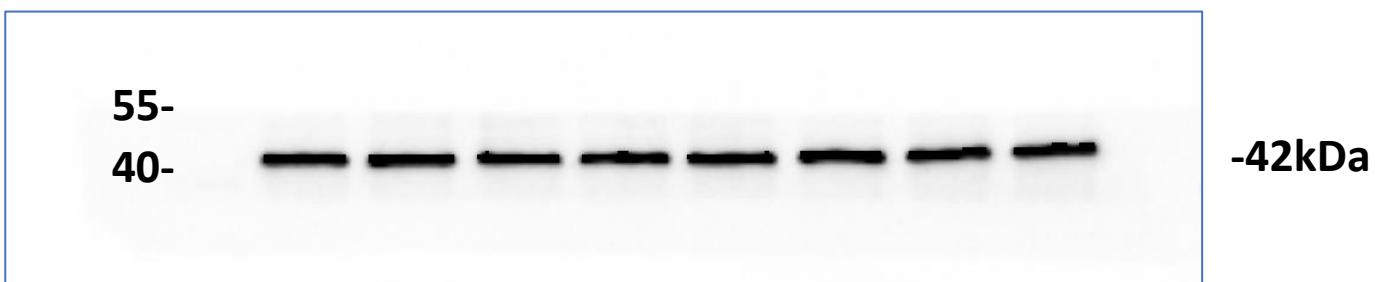

Figure 7B - MDA-MB-231

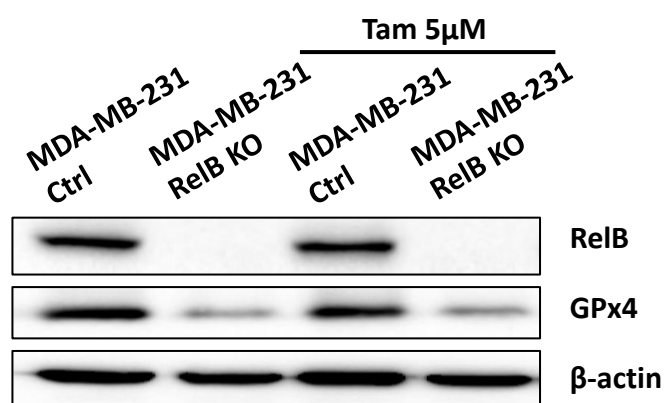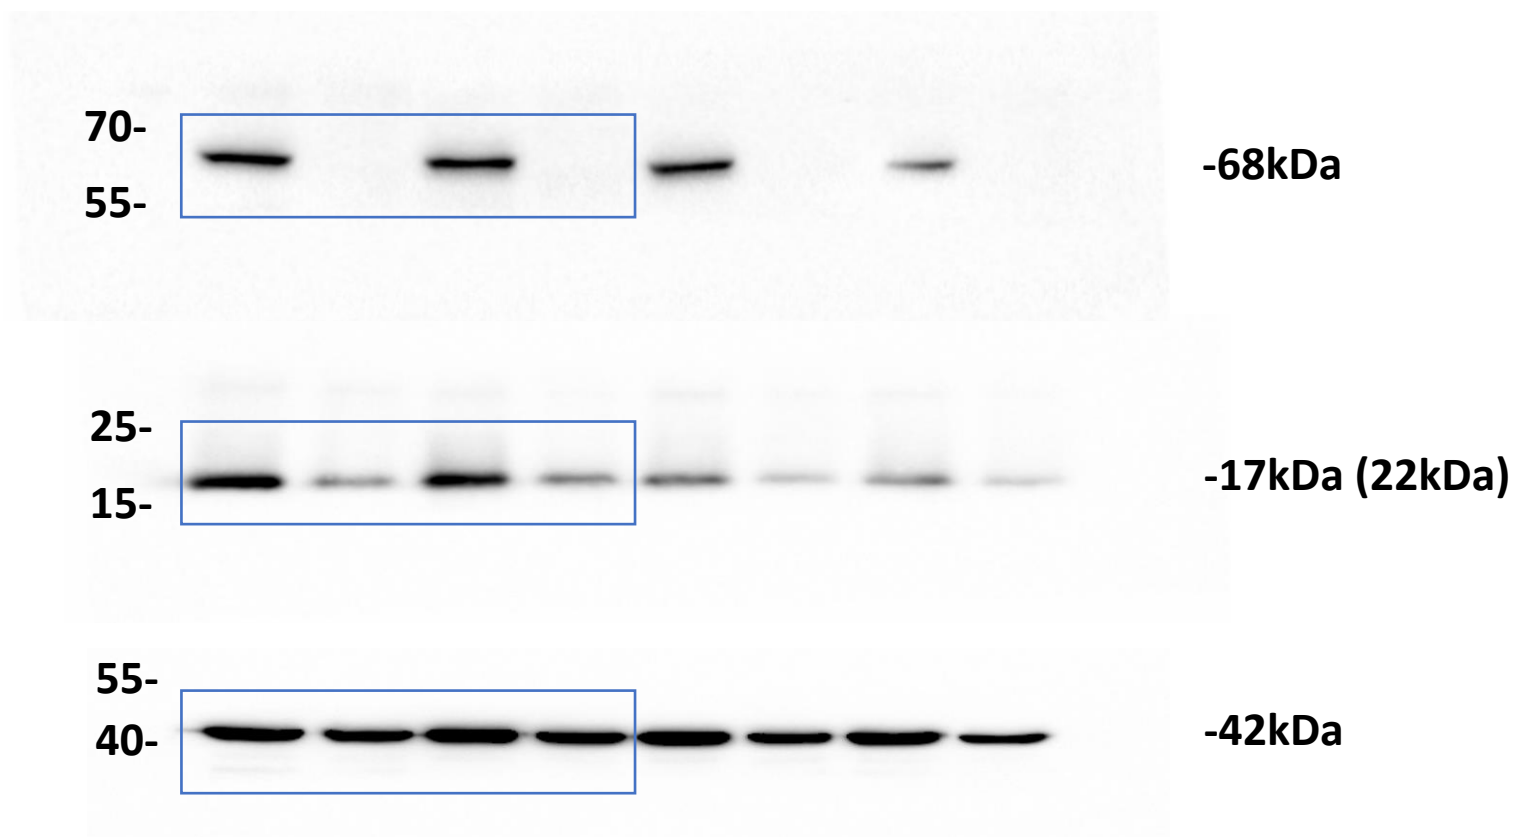

Figure 8G

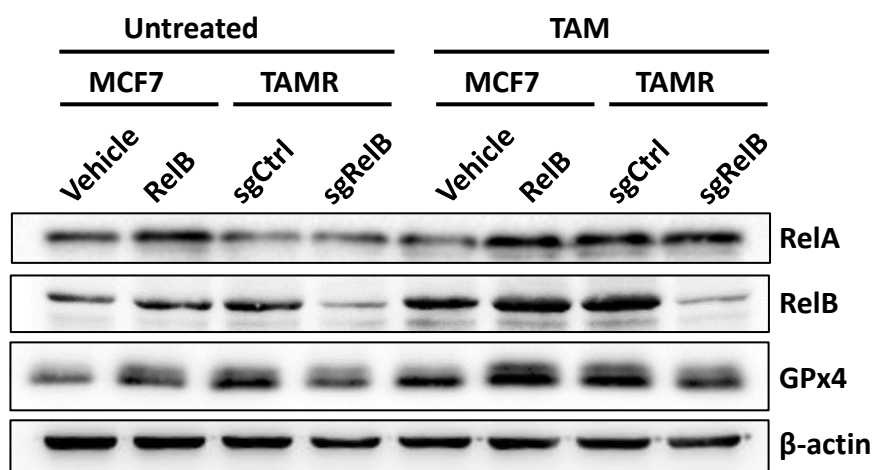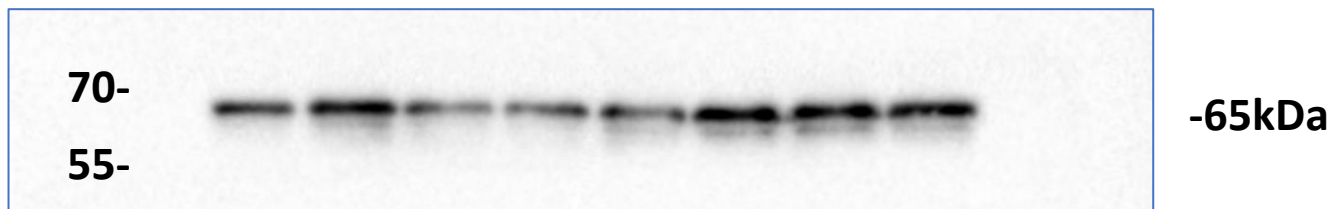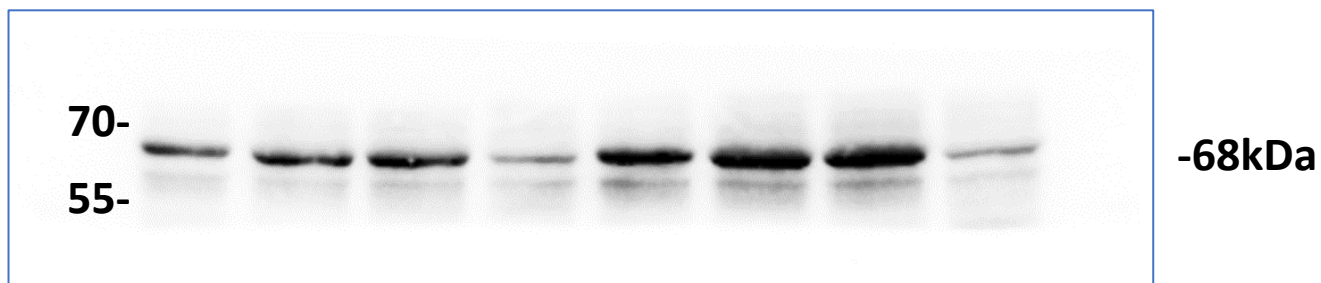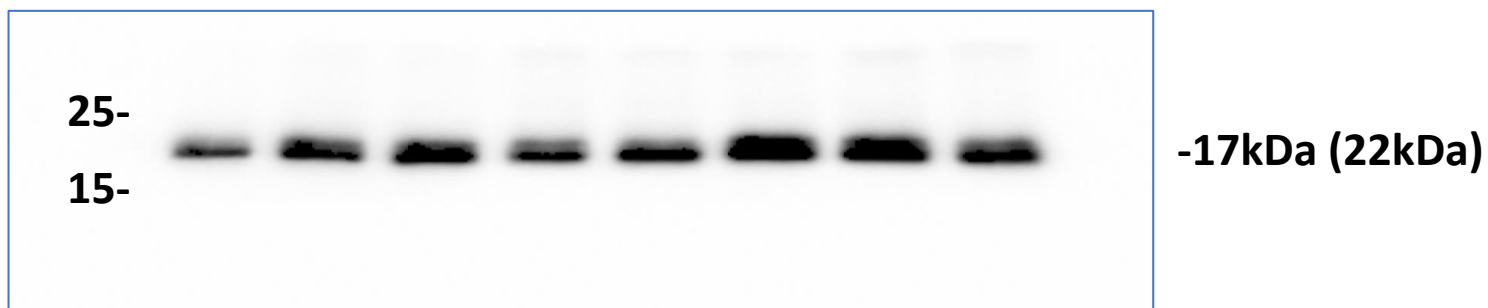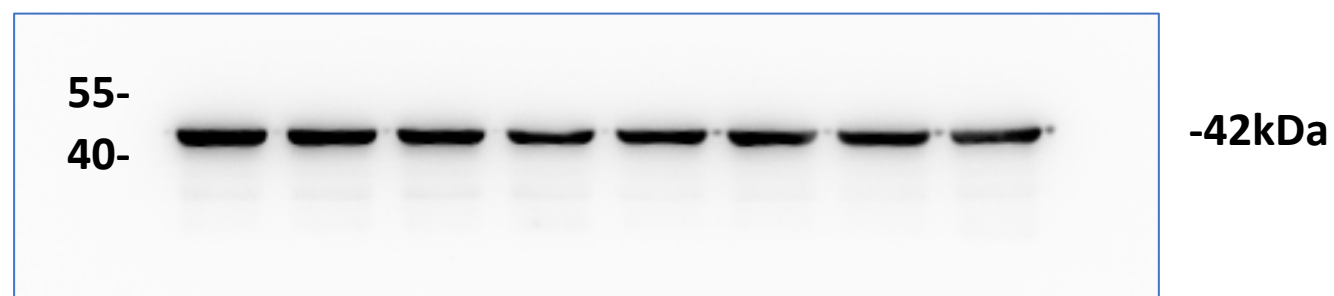

Figure. S1F

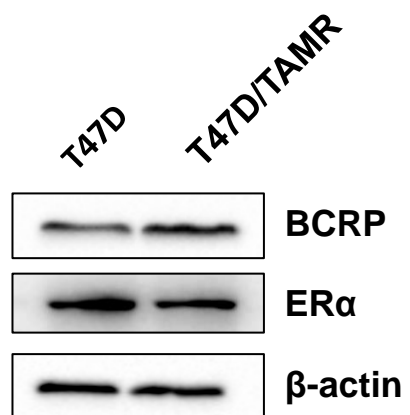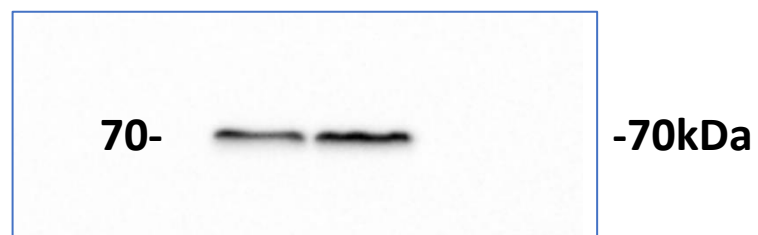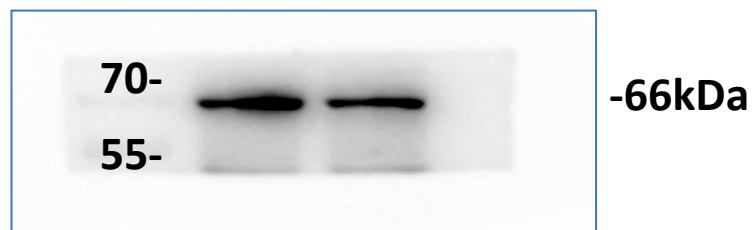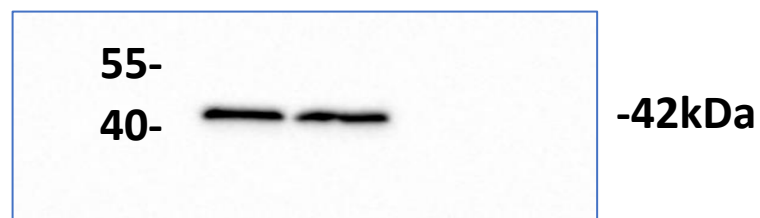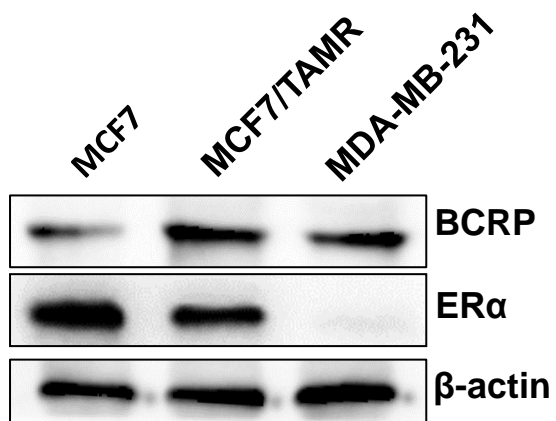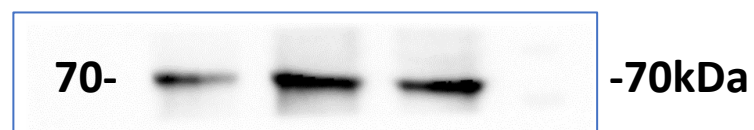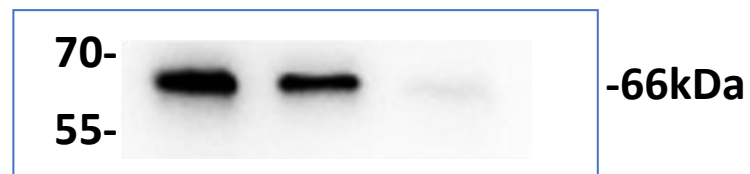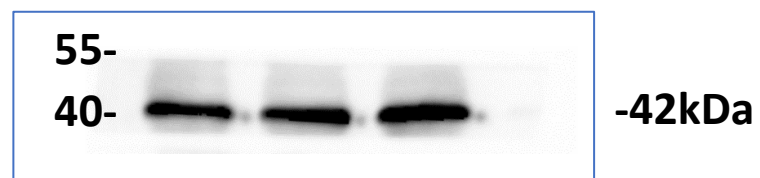

Figure. S7A

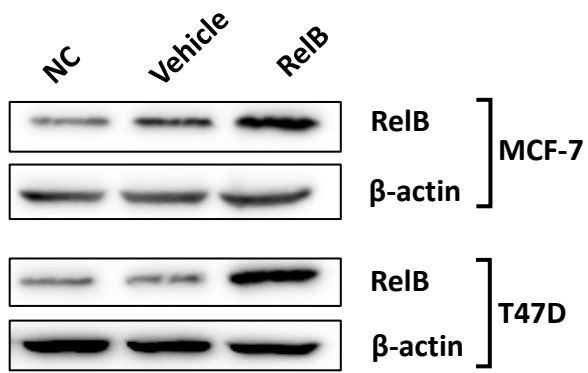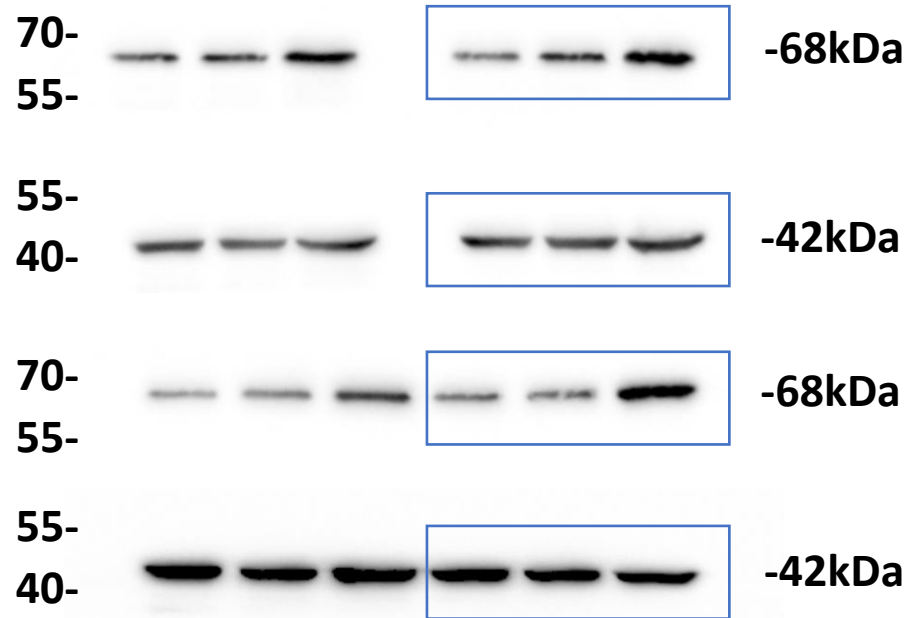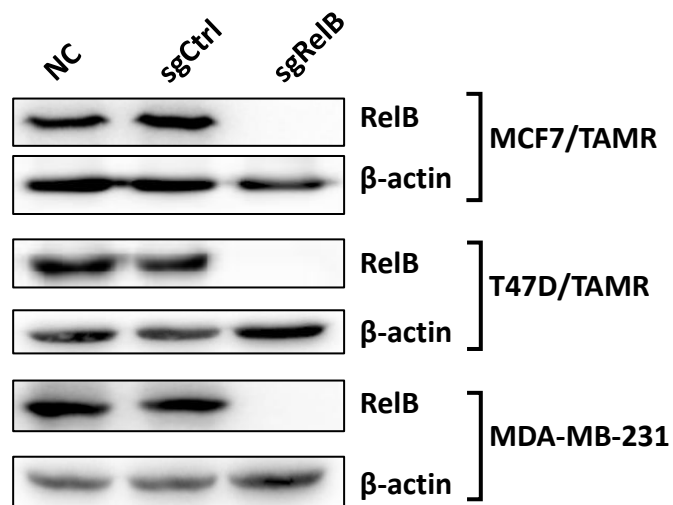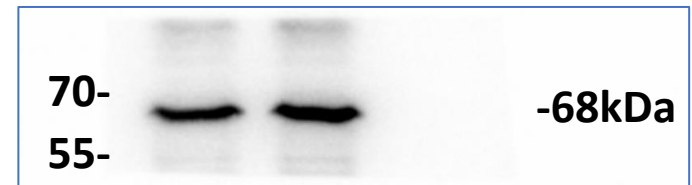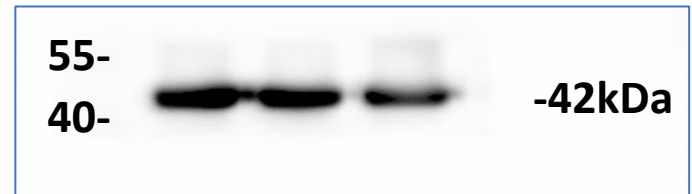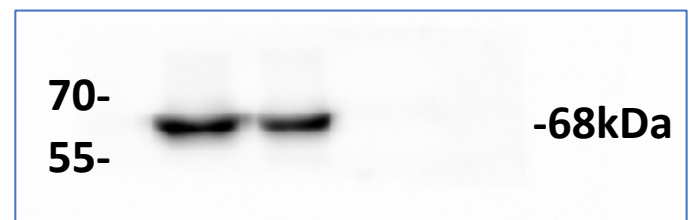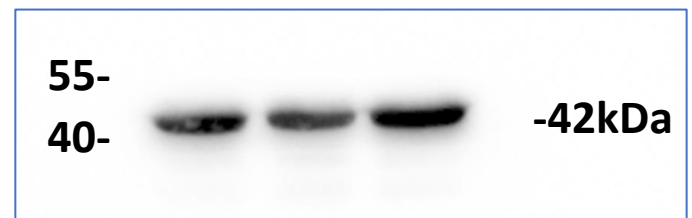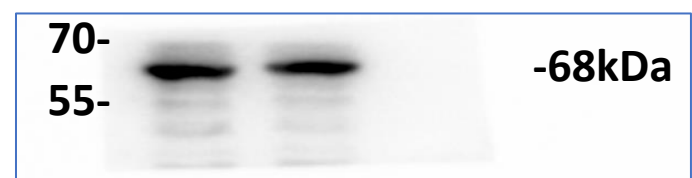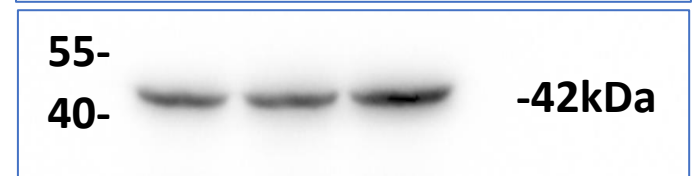



Figure. S9A – MCF7/TAMR

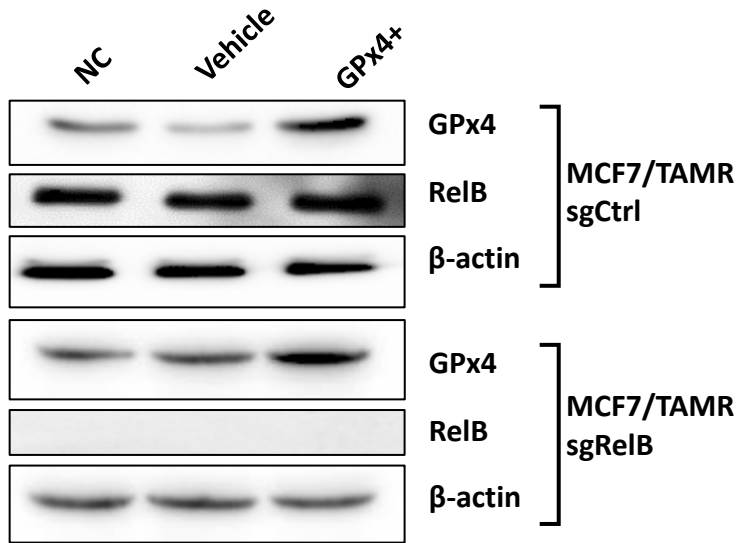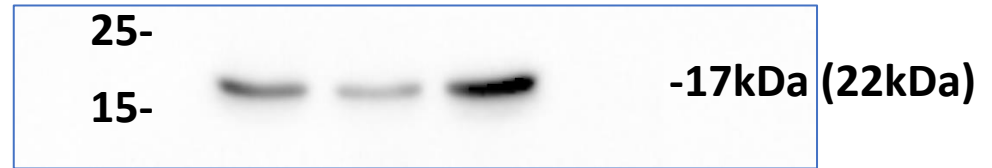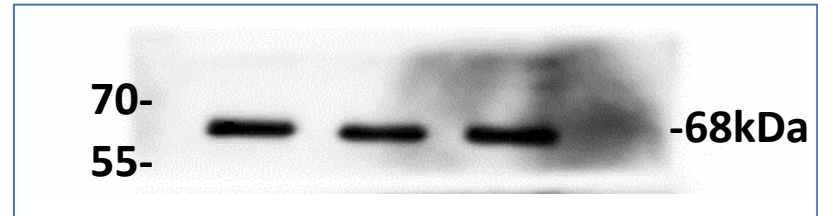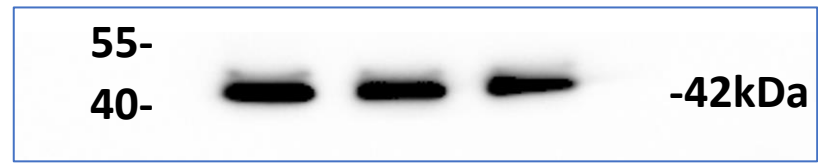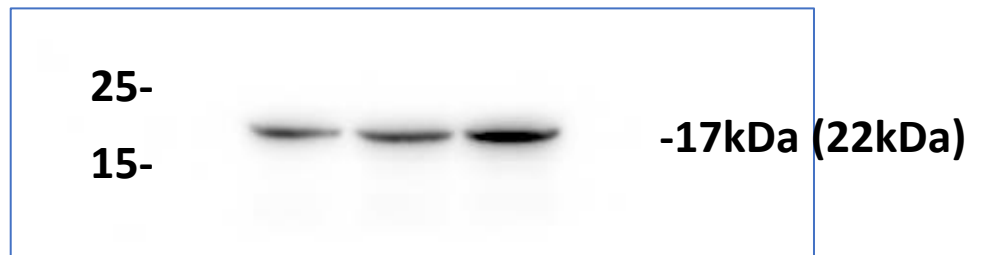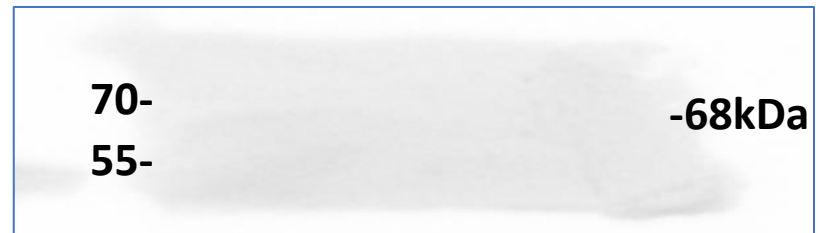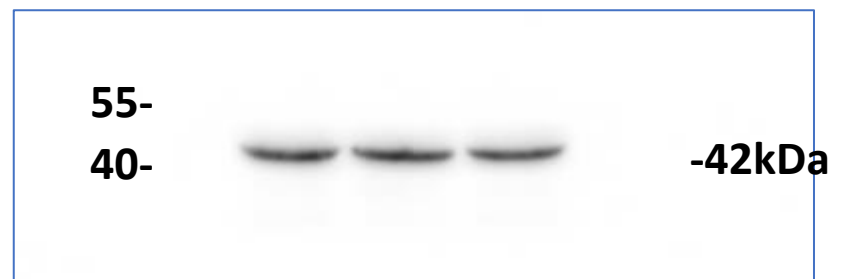

Figure. S9A – T47D/TAMR

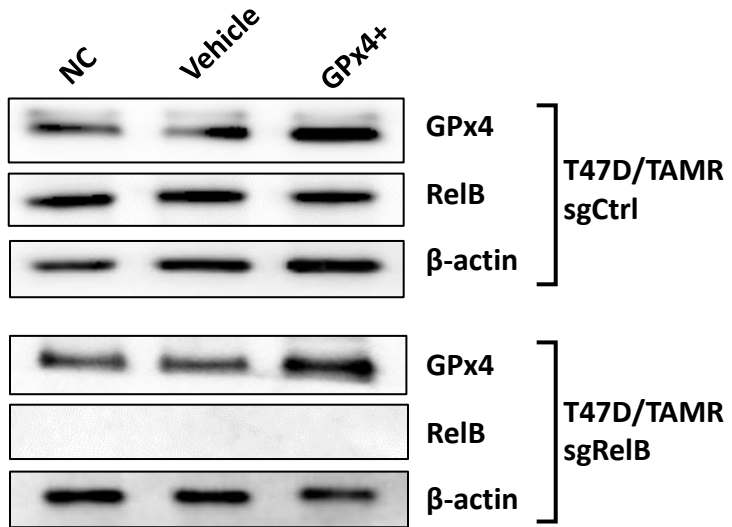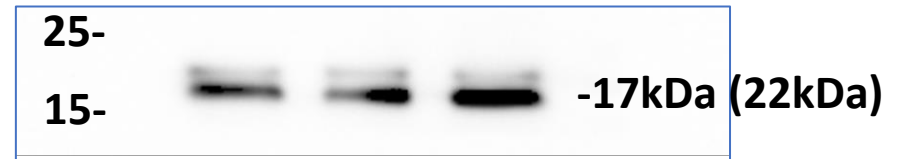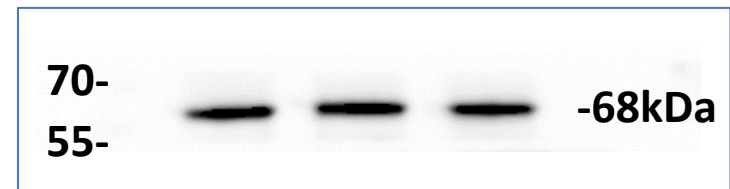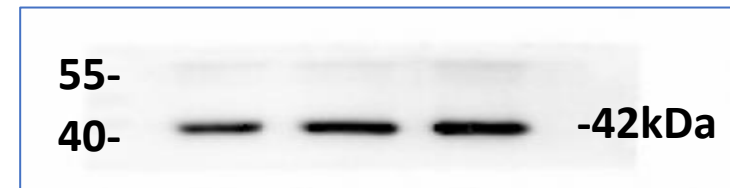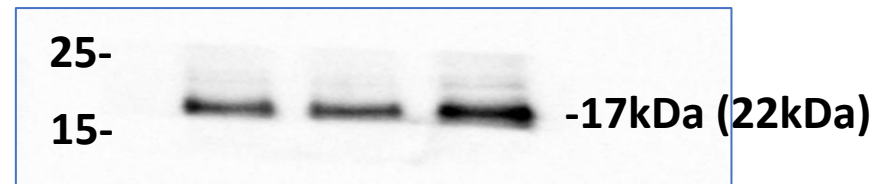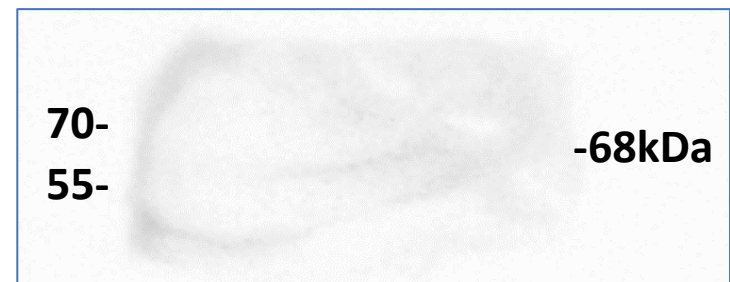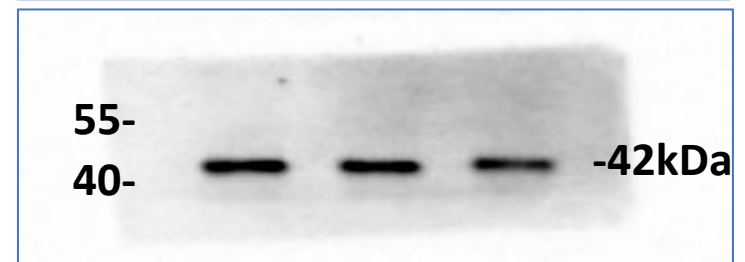

Figure. S9B – MCF7

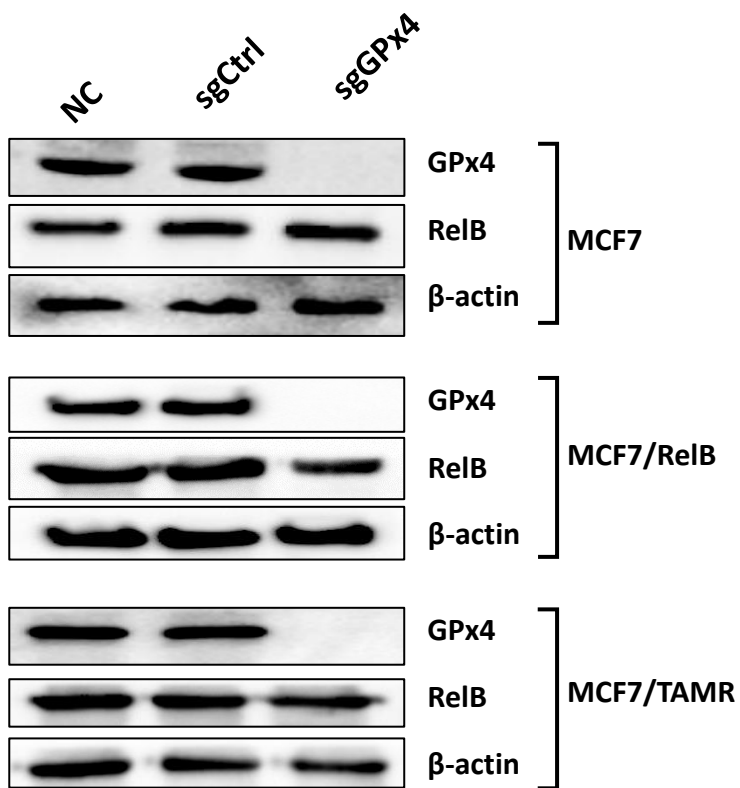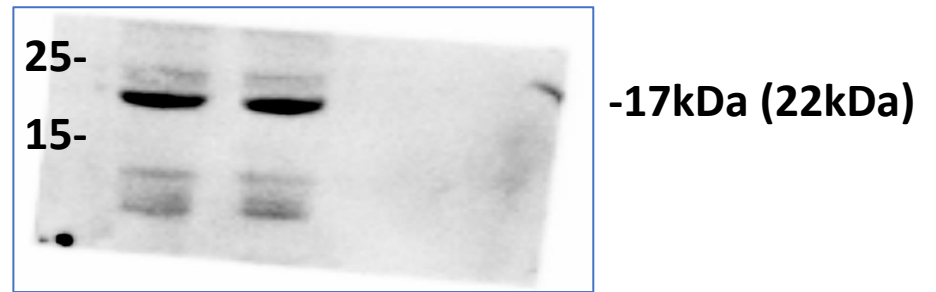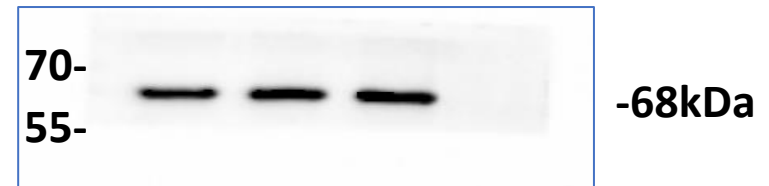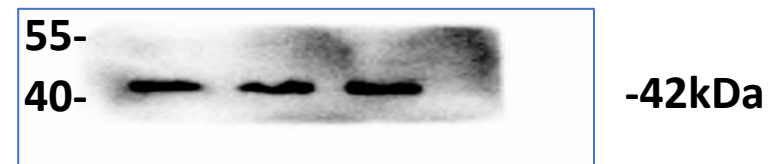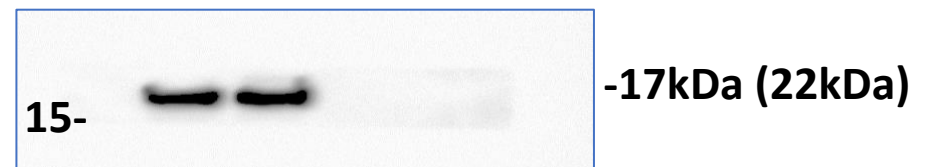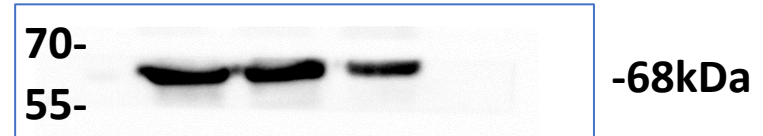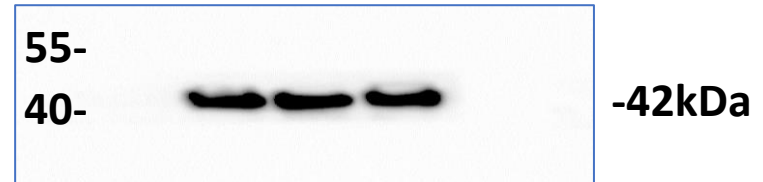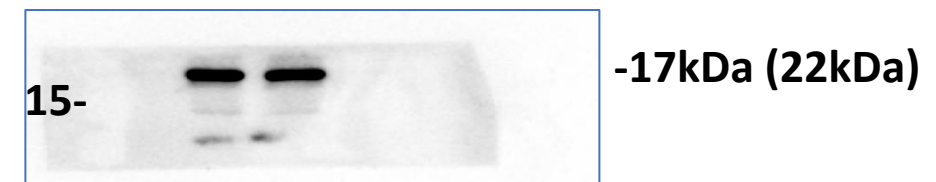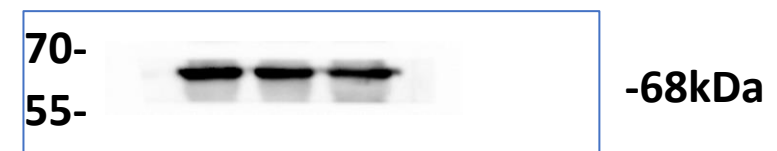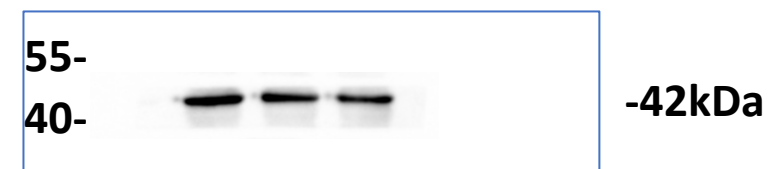

Figure. S9B – T47D

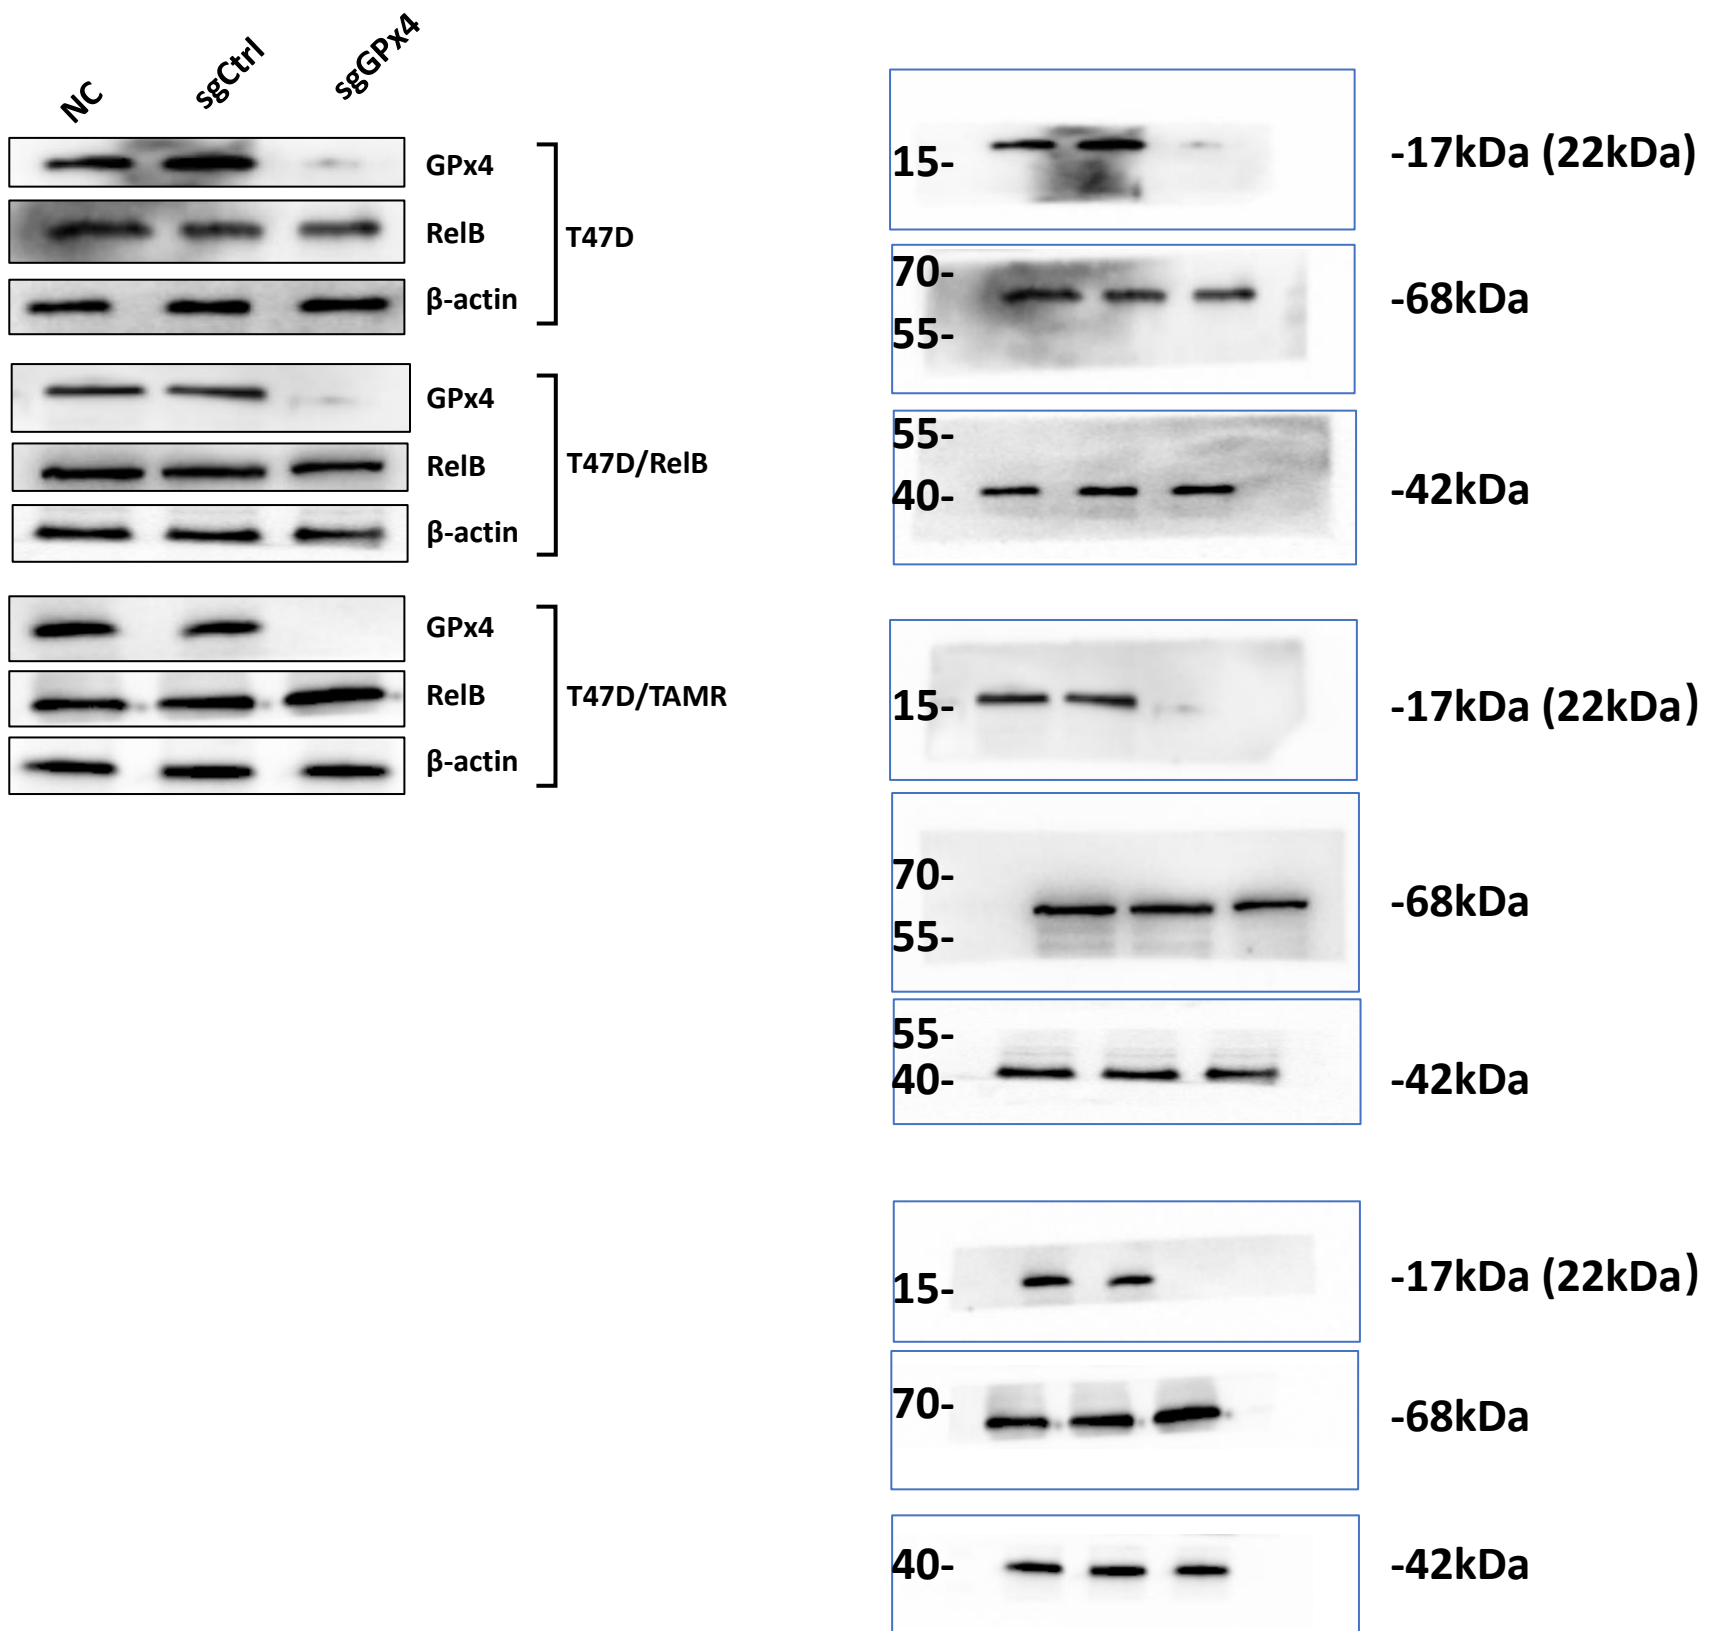

Supplement: mmc3.pdf [file mmc3.pdf]
